# Supplementary material for: Severe Bone Loss as Part of the Life History Strategy of Bowhead Whales
Source: PLoS One. 2016 Jun 22;11(6):e0156753. doi: 10.1371/journal.pone.0156753 (PMC4917217; doi:10.1371/journal.pone.0156753)
Supplement: S1 File — (XLSX) [file pone.0156753.s001.xlsx]

## Sheet: Sheet1
whale	Body length	longest baleen plate	rostrum-blowhole	surface area one baleen rack (m2)	pl1	pl2	pl3	pl4	pl5	pl6	pl7	pl8	pl9	pl10	pl11	pl12	pl13	pl14	pl15
2015B10	9.58	1.77		35376	76	106	140	157	158	153	145	133	114	77
2015B11	10.54	2.05		41965	71	110	162	180	185	184	179	167	150	121	70
2015B13	9.04	0.91		11625	49	60	73	75	70	63	49	39
2015B14	8.74	1.83		32862	79	96	123	141	155	161	162	156	124	98
2015B15	12.78	2.6		68502	93	139	208	240	251	250	244	235	223	204	181	162	139	98
2015B16	10.87	2.06		40575	85	117	167	180	185	178	164	147	125	89	65
2015B17	11.45	2.14		45628	84	155	182	194	198	190	178	162	148	120
2015B24	14.5	2.74		97550	180	230	230	250	260	262	265	260	255	240	223	205	180	150	115
