# Supplementary material for: Severe Bone Loss as Part of the Life History Strategy of Bowhead Whales
Source: PLoS One. 2016 Jun 22;11(6):e0156753. doi: 10.1371/journal.pone.0156753 (PMC4917217; doi:10.1371/journal.pone.0156753)
Supplement: S3 File — (XLSX) [file pone.0156753.s003.xlsx]

## Sheet: Figure 5 data
Whale number		Dorsal slice (20 cm from serr ven)			Ventral slice(20 cm from stern jt)
	baleen L (cm)	Density	Bone area/Total Area	Total Area (cm2)	Density	Bone Area/Total Area	Total Area (cm2)
2014B6F	10	652	0.43	393	597	0.31	1290
2013B13	39	756.987	0.85	1386.89	693	0.53	2275.62
2014B12	45	711	0.9	1493	698	0.65	3861.13
2013B3	77	829.993	0.95	1655	795.765	0.77	2702
2013B7	140	846.43	0.8	983.083	797.077	0.66	1375.12
2013B20	94	810.703	0.95	1714.71	786	0.79	2977
2013B6	144	848.627	0.9	1267.56	864.921	0.77	1499
2014B13	195	837	0.73	1946.43	796	0.48	2150
2014B15	201	828	0.79	2052	823	0.63	2430
2013B4	220	864.904	0.72	1887.51	804.114	0.55	3131.06
2013B1	342	927	0.67	7061.32	920	0.59	10296.5
2015B15	260	869	0.83485	3495.91	850	0.54639	6044.67
2015B14	183	862	0.81399	1354.65
2015B13	91	760	0.97566	2531.84	710	0.83148	3832.59
2015B12	170	814	0.73502	1178.34	789	0.72764	1675.95
2015B11	205	851.86	0.86089	1569.55	848.447	0.72184	2645.09
2015B10	177					0.75883	2701.04

## Sheet: Figure 4 data
specimen	greatest baleen length (cm)	rib length- serr vent to sternum(cm)	sample distance from dorsal (cm)	sample distance from dorsal (% of total L)	Mean Density (mgHA/ccm)	%bone Area(boneA/TotalA))	Area total (mm2)
2015B15	260	170	20	0.117647	869	83.485	3495.91
2015B15	260	170	40	0.235294	878	77.921	3755.99
2015B15	260	170	60	0.352941	868	74.139	4582.53
2015B15	260	170	80	0.470588	858	72.945	4774.55
2015B15	260	170	100	0.588235	848
2015B15	260	170	120	0.705882	850	64.057	6149.18
2015B15	260	170	140	0.823529	850	54.639	6044.67
2015B15	260	170	160	0.941176	825	45.678	6364.44
2015B14	183	110	20	0.181818	862	81.399	1354.65
2015B14	183	110	40	0.363636	844	79.778	1460.7
2015B14	183	110	60	0.545455	825	81.288	1600.26
2015B14	183	110	80	0.727273	812	79.722	1687.19
2015B14	183	110	100	0.909091	793	70.501	1806.73
2015B13	91	120	20	0.166667	760	97.566	2531.84
2015B13	91	120	40	0.333333	740	97.44	2980.25
2015B13	91	120	60	0.5	717	94.752	3561.52
2015B13	91	120	80	0.666667	703	91.855	3755.93
2015B13	91	120	100	0.833333	710	83.148	3832.59
2015B12	170	100	20	0.2	814	73.502	1178.34
2015B12	170	100	40	0.4	809	73.538	1372.27
2015B12	170	100	60	0.6	790	68.459	1634.3
2015B12	170	100	80	0.8	789	72.764	1675.95
2015B12	170	100	100	1	775	70.145	1786.66
2015B11	205	150	20	0.133333	851.86	86.089	1569.55
2015B11	205	150	40	0.266667	861.76	85.169	1779.8
2015B11	205	150	60	0.4	851.505	81.865	2009.17
2015B11	205	150	80	0.533333	847.368	76.664	2268.01
2015B11	205	150	100	0.666667	842.152	76.675	2481.99
2015B11	205	150	120	0.8	848.447	72.184	2645.09
2015B11	205	150	140	0.933333	807.82	67.636	3113.23
2015B10	177	123	20	0.162602
2015B10	177	123	40	0.325203	848.85	85.873	1604.2
2015B10	177	123	60	0.487805	822.277	82.838	1907.56
2015B10	177	123	80	0.650407	817.6	78.916	2117.88
2015B10	177	123	100	0.813008	812.474	76.356
2015B10	177	123	120	0.97561		75.883	2701.04
